# Supplementary material for: Complete genome sequence of Mycobacterium tuberculosis K from a Korean high school outbreak, belonging to the Beijing family
Source: PubMed Central journal article supplement (PMC4606834; doi:10.1186/s40793-015-0071-4), 2015-10-14
Supplement: 40793_2015_71_MOESM2_ESM.pdf [file 40793_2015_71_MOESM2_ESM.pdf]

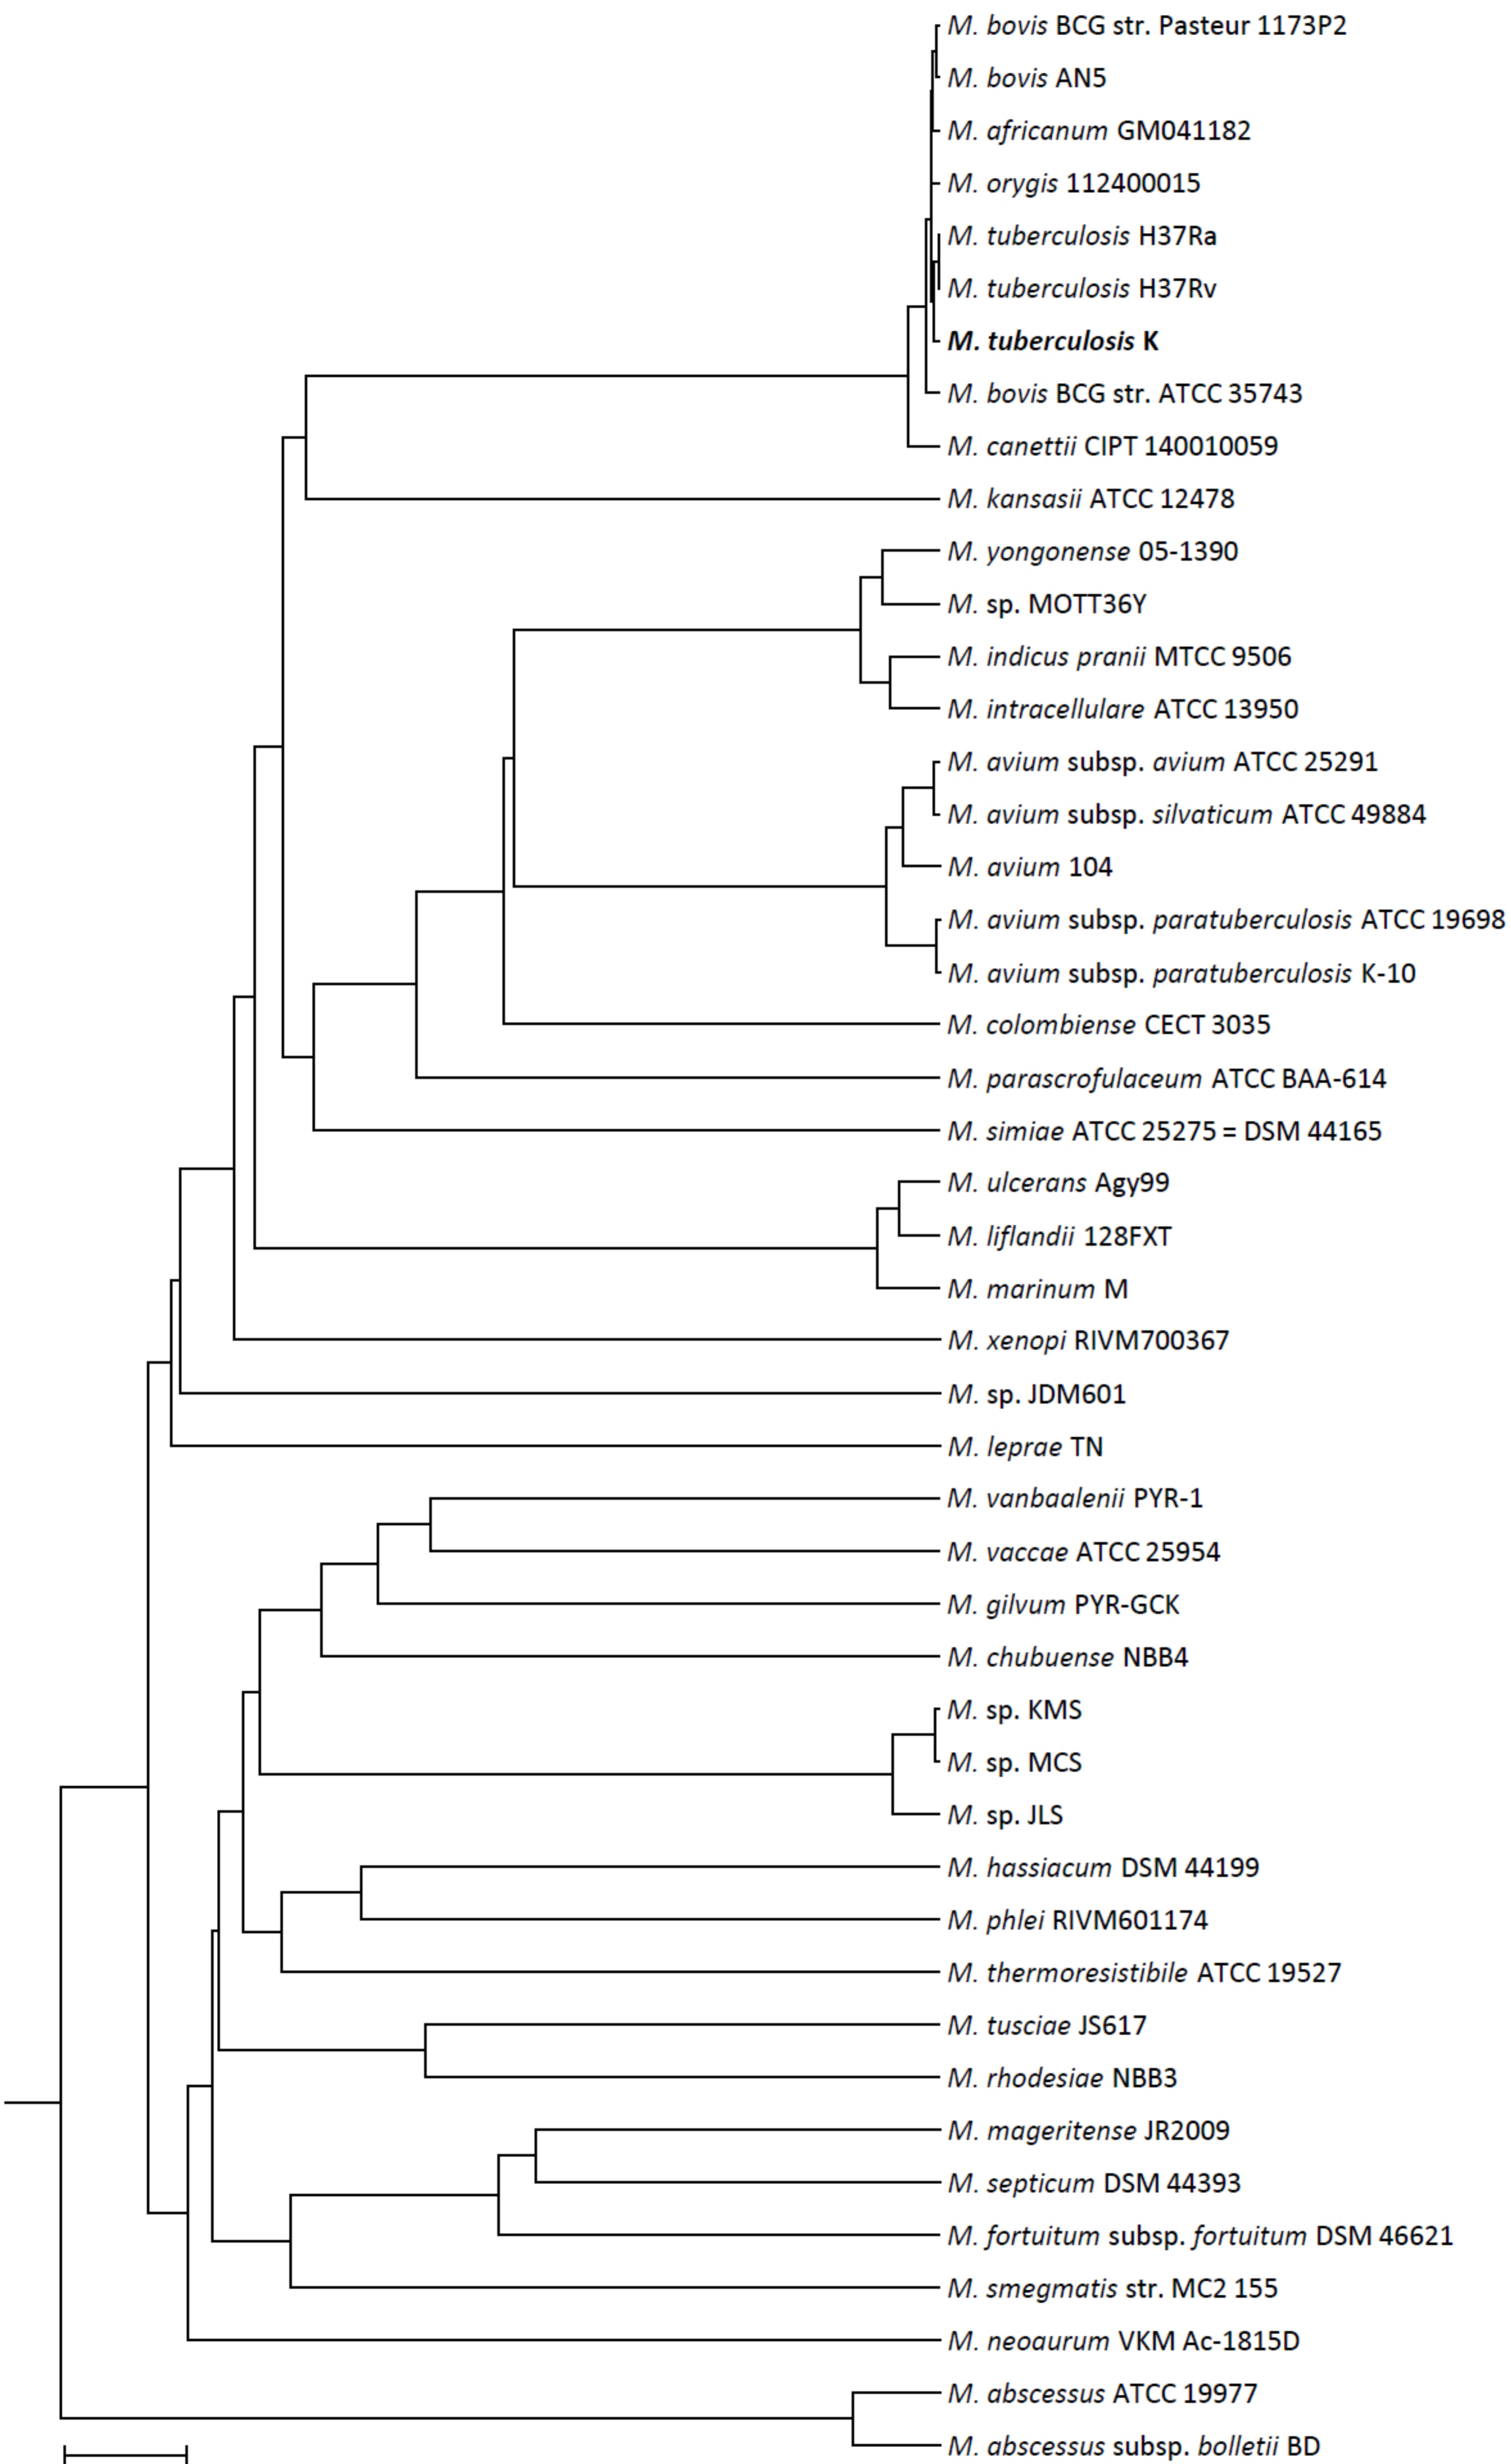

0.02
